# Supplementary material for: Comprehensive Analysis of Metabolome and Transcriptome Reveals the Regulatory Network of Coconut Nutrients
Source: MDPI journal article supplement (doi:10.3390/metabo13060683), 2023-05-24
Supplement: s1 [file s1]

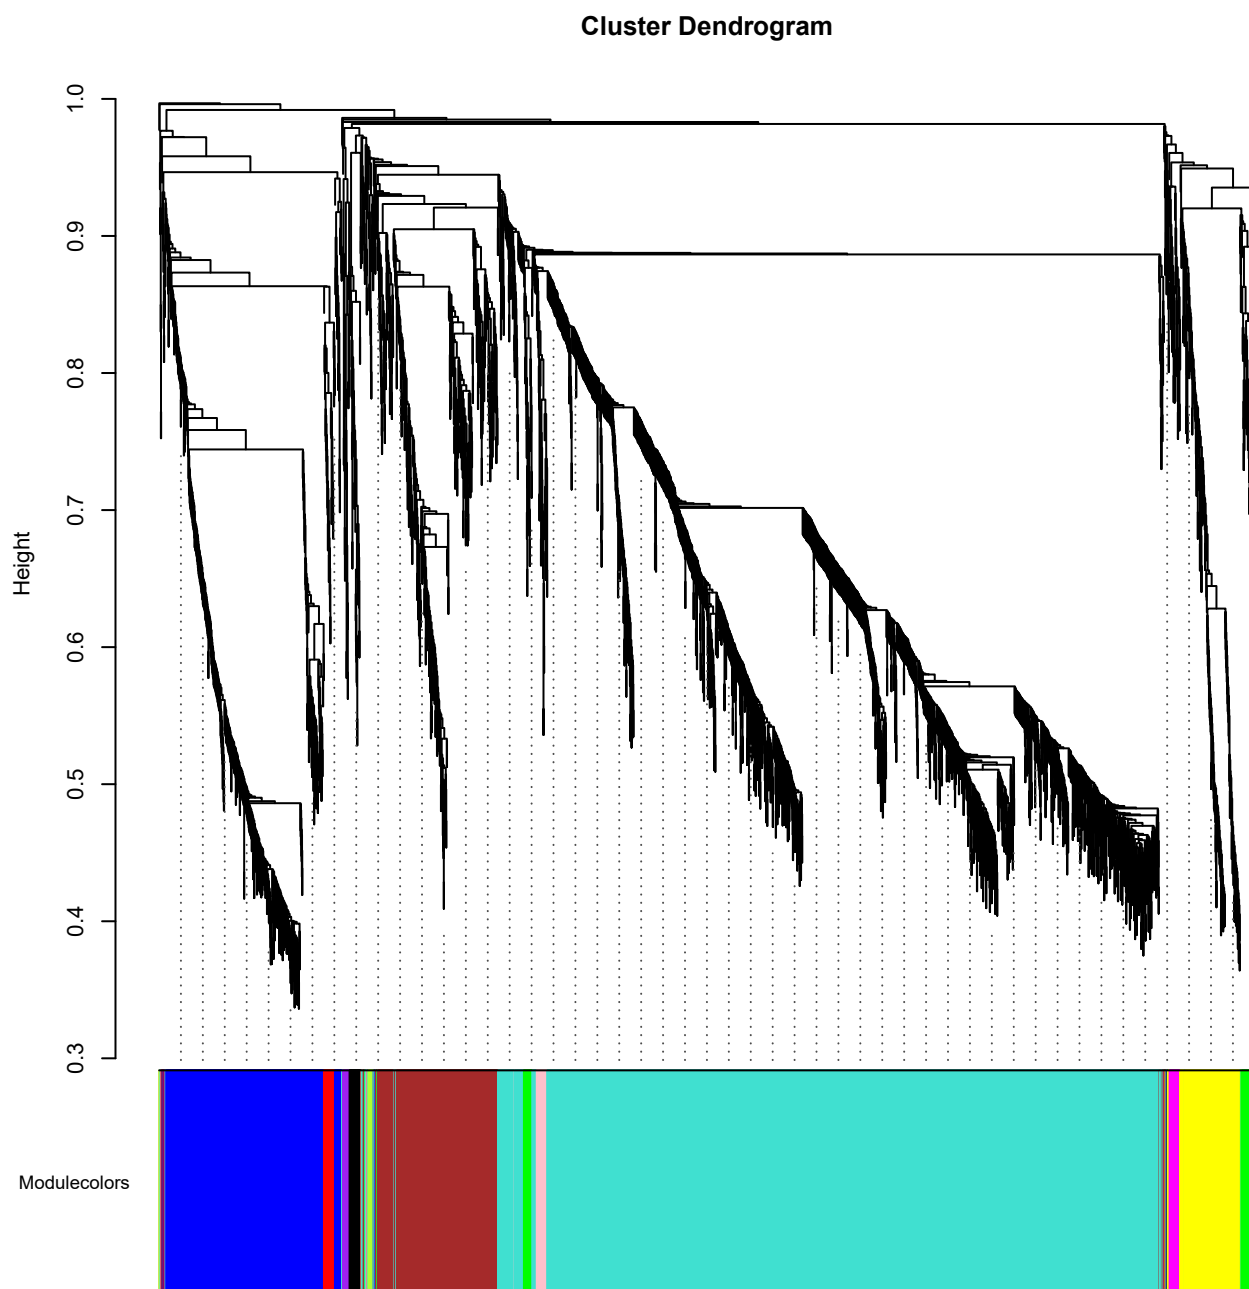

Figure S5: Hierarchical clustering tree (dendrogram) of genes based on coexpression network analysis.
