# Supplementary figures and images for: Comprehensive Analysis of Metabolome and Transcriptome Reveals the Regulatory Network of Coconut Nutrients
Source: MDPI journal article supplement (doi:10.3390/metabo13060683), 2023-05-24

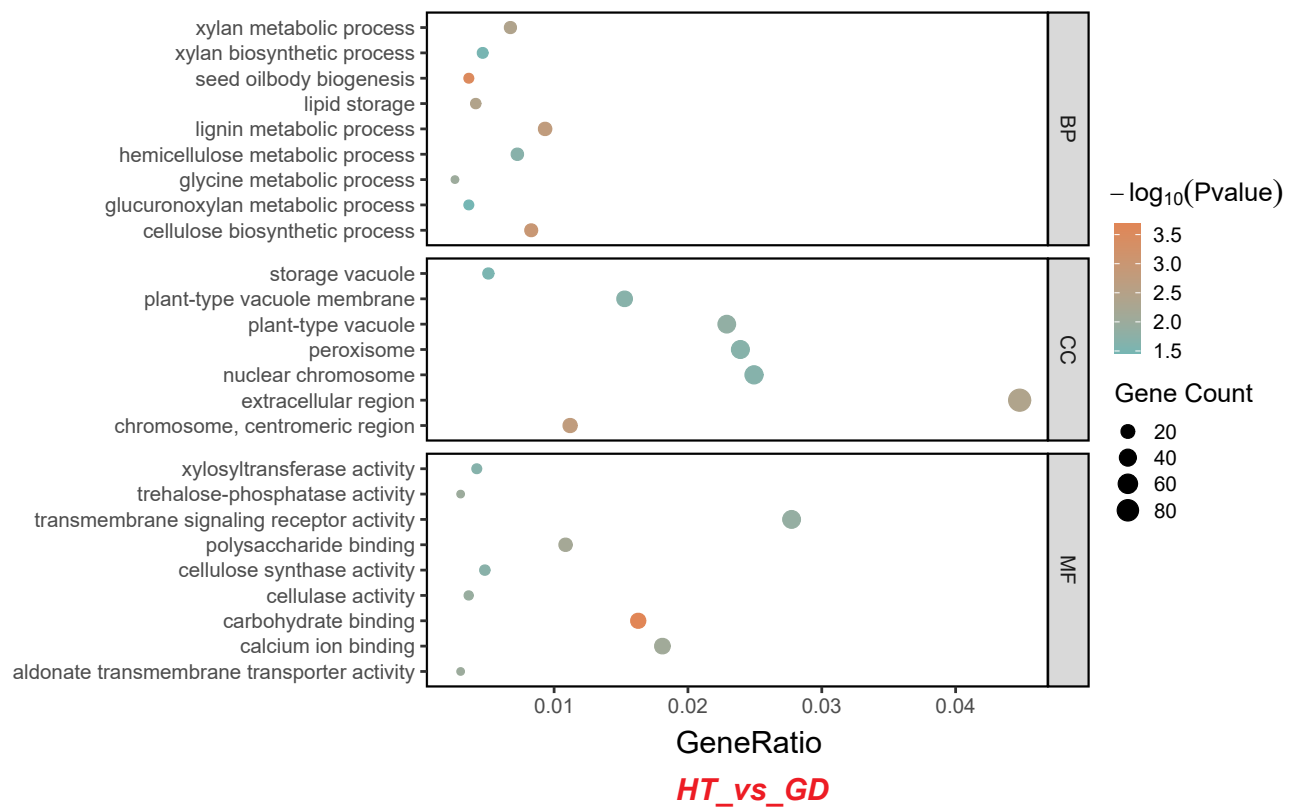

Figure S8: GO analysis of differential genes between GD and HT.

Supplement: s1 [file s1]

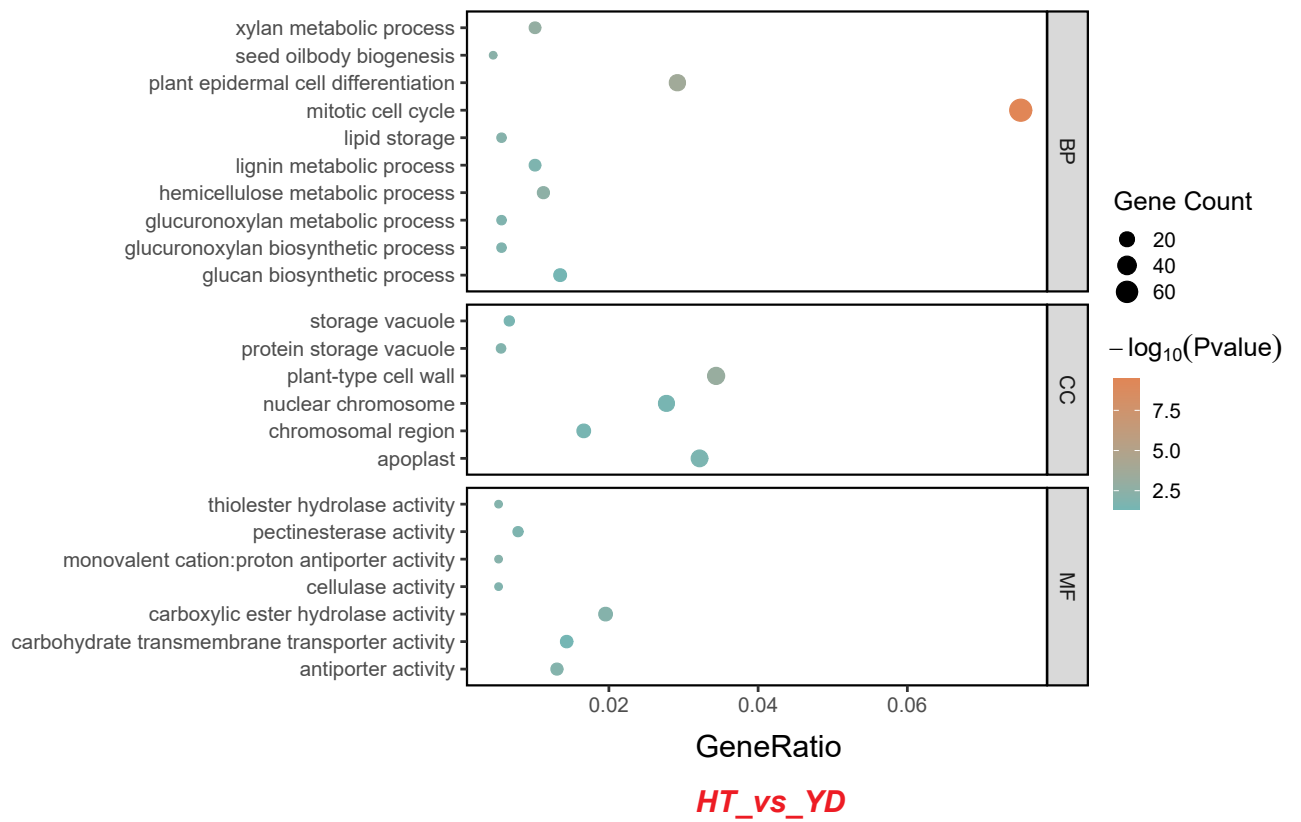

Figure S7: GO analysis of differential genes between HT and YD.

Supplement: s1 [file s1]

**(a)**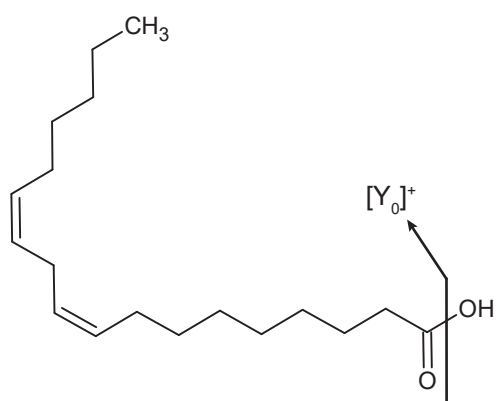**(b)**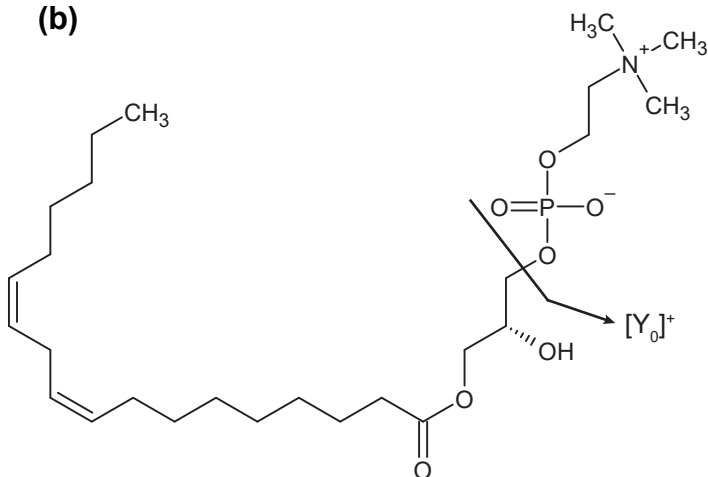**(c)**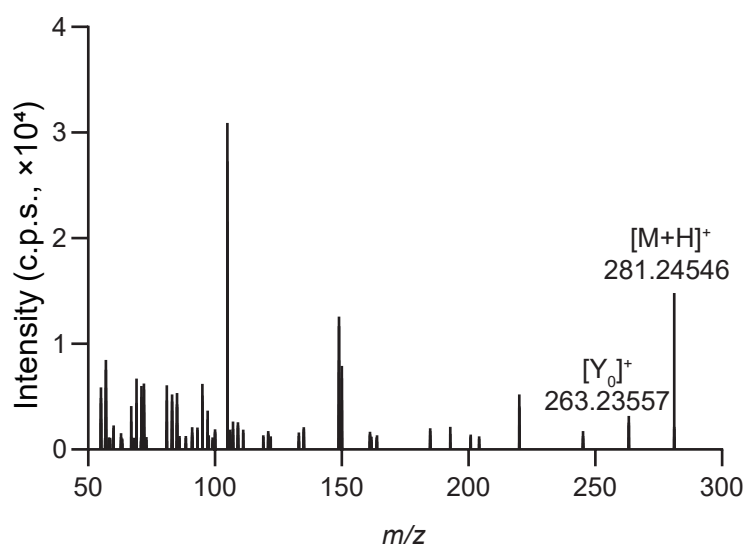**(d)**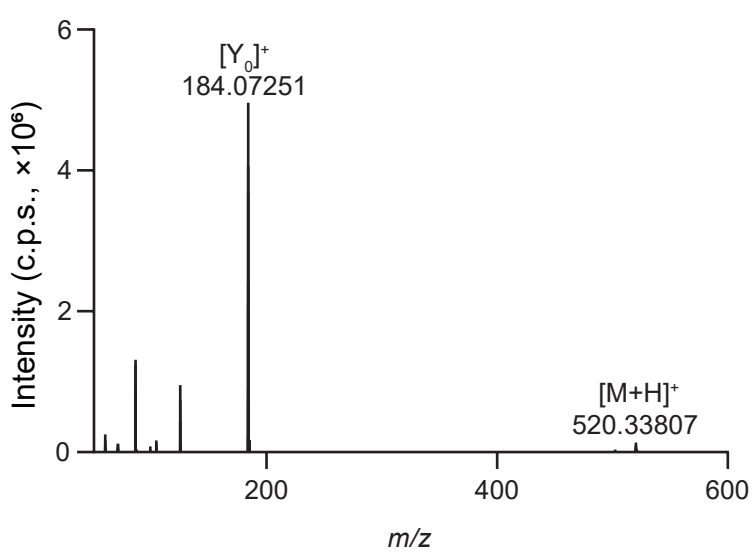

Figure S1: Identification of metabolites by mass spectrometry.

Supplement: s1 [file s1]

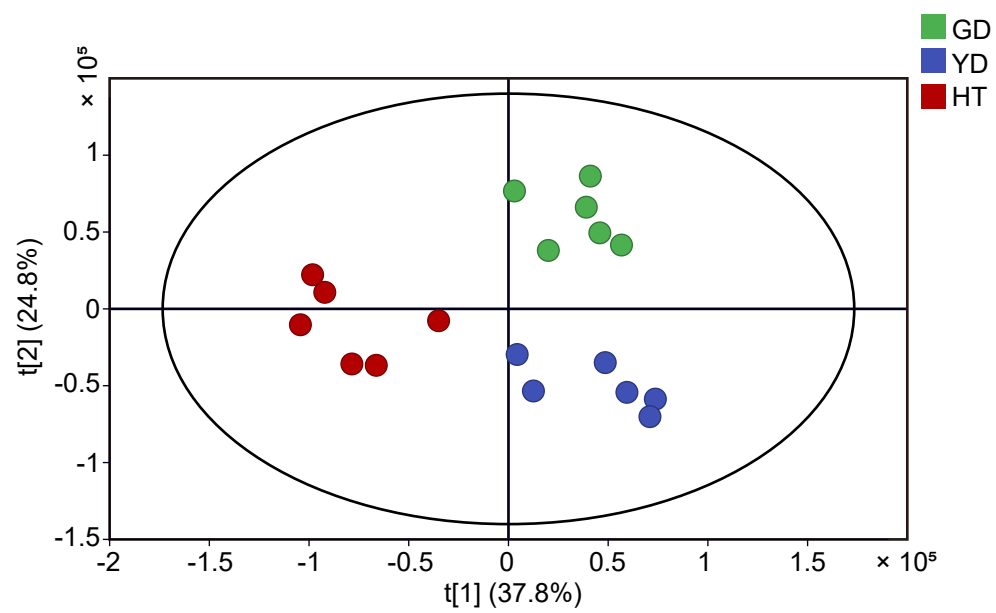

Figure S2: OPLS-DA model diagram of LC-MS metabolomes of three cultivars of coconut.

Supplement: s1 [file s1]

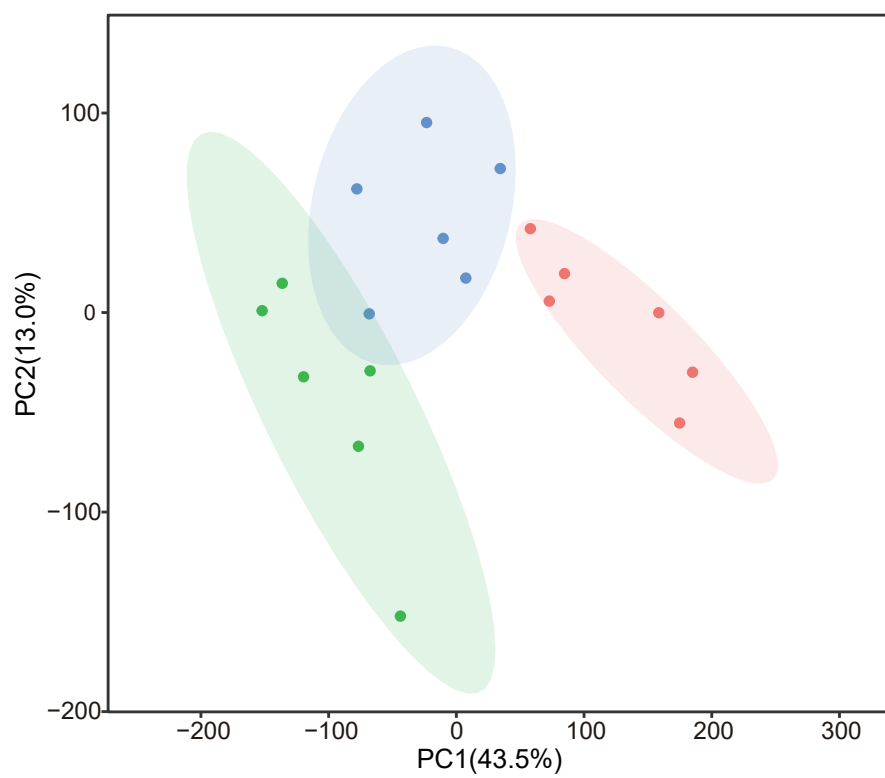

Figure S4: PCA of RNA-seq data.

Supplement: s1 [file s1]

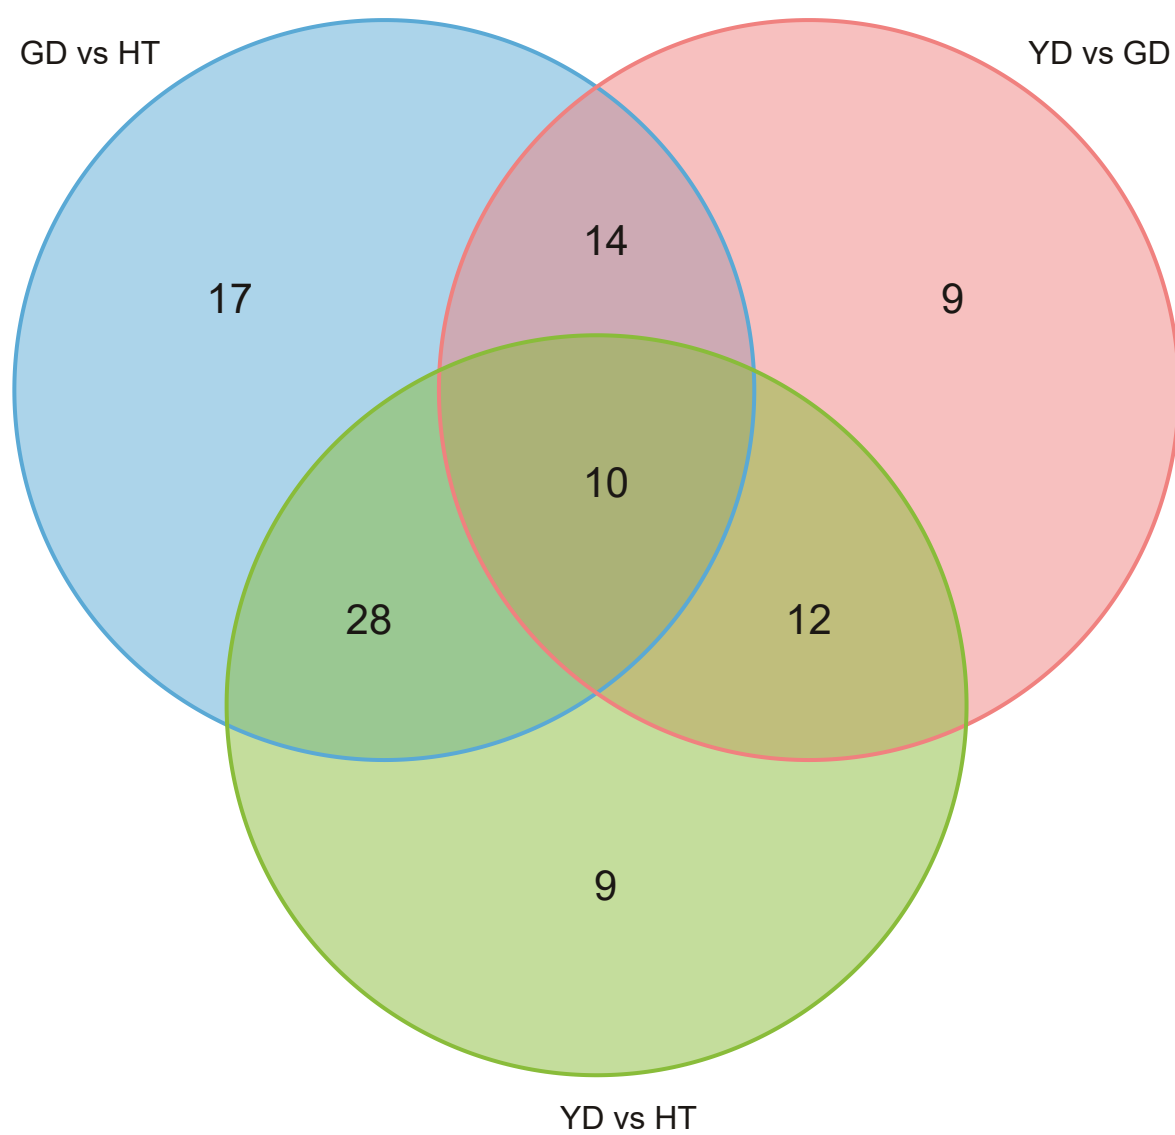

Figure S3: The number of differential metabolites among different coconut cultivars.

Supplement: s1 [file s1]

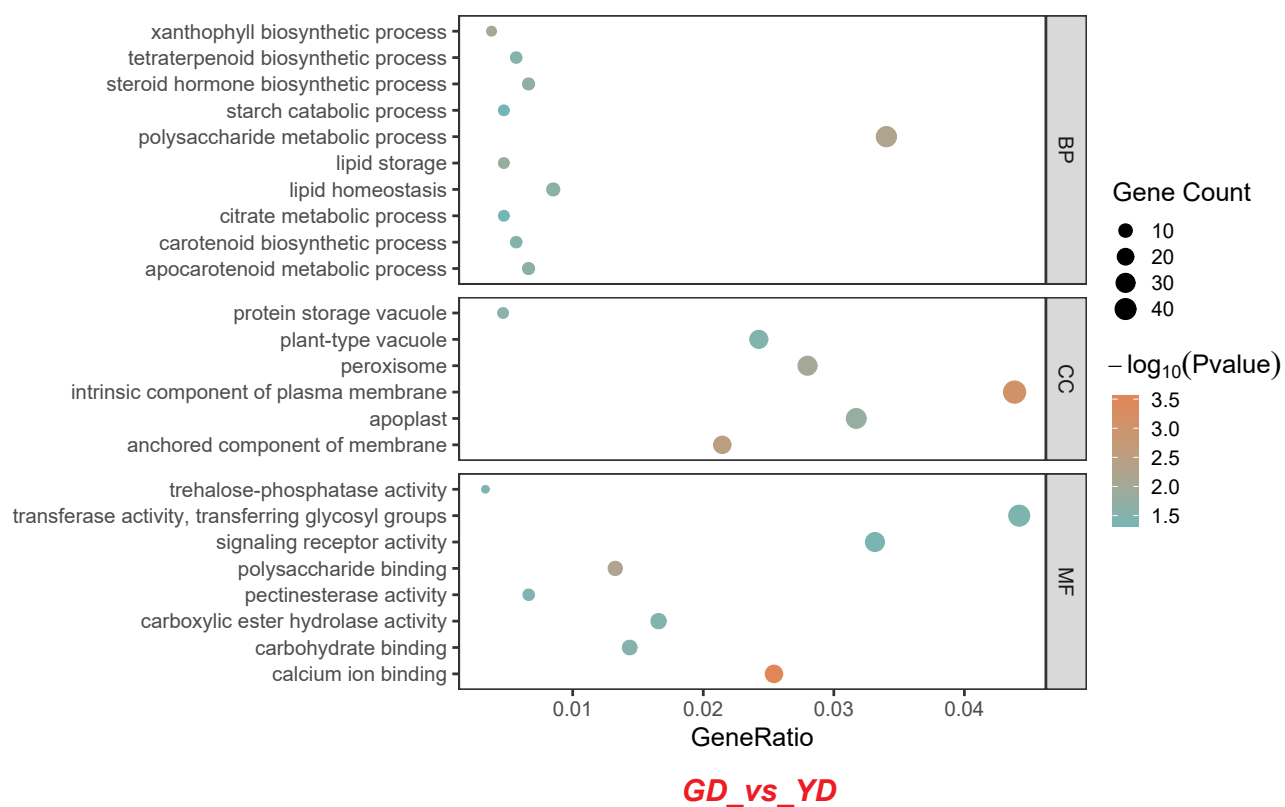

Figure S6: GO analysis of differential genes between GD and YD.

Supplement: s1 [file s1]
